# Supplementary material
Source: PubMed Central journal article supplement (PMC6031053)
Supplement: ddy156_supplementary_figures.pdf [file ddy156_supplementary_figures.pdf]

## Supplementary Material

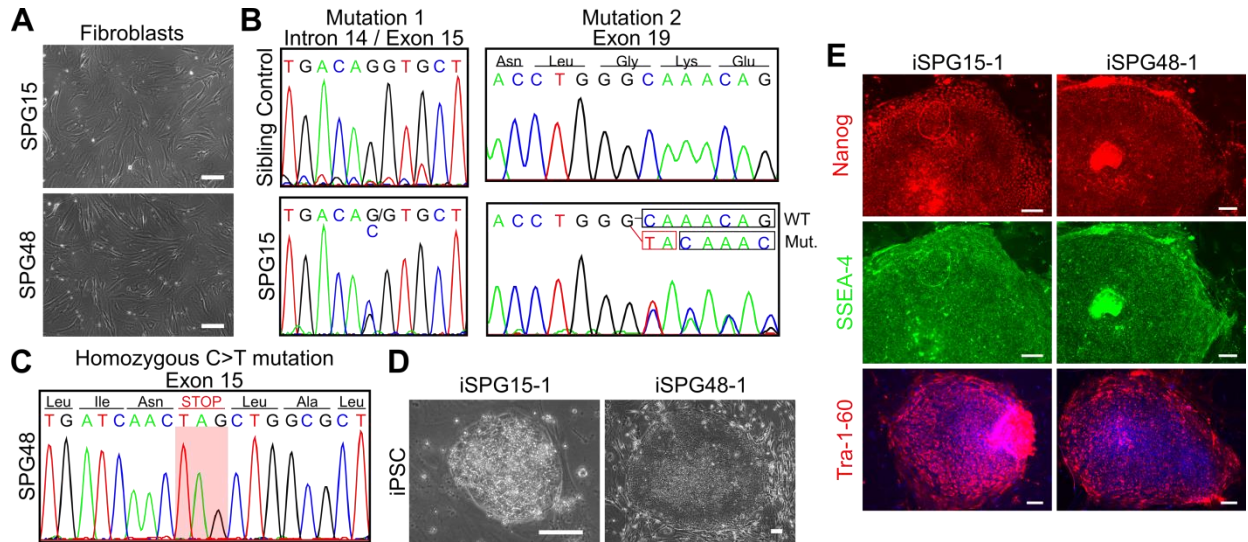

**Supplementary Figure 1.** Generation and characterization of SPG15 and SPG48 iPSC lines.

**(A)** Representative phase contrast images of SPG15 and SPG48 fibroblast cells. Scale bars:

200  $\mu$ m. **(B)** Sanger sequencing identified compound heterozygous mutations in the *ZFYVE26*

gene in the SPG15 patient line. One mutation is located at the splice acceptor site of intron 14

(c.2554-1 G>A) resulting in the skipping of exon 15, and the other is a nonsense mutation in

exon 19 (c.3417\_3418insTA; p. Lys1140X) which results in truncation of the protein. **(C)**

Sequencing of DNA from SPG48 iPSCs revealed a homozygous c.1732 C>T nucleotide

substitution, resulting in a premature stop codon in exon 15 of the *AP5Z1* gene. **(D)** SPG15 and

SPG48-derived iPSC colonies display typical ESC-like morphology. Scale bars: 100  $\mu$ m. **(E)** All

examined lines stained positive for the pluripotency markers Nanog, SSEA-4, and Tra-1-60.

Scale bars: 100 $\mu$ m.

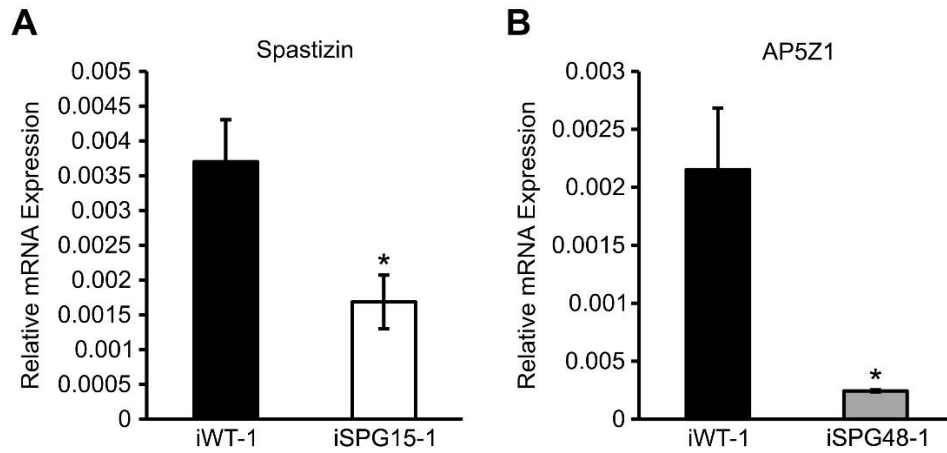

**Supplementary Figure 2.** Reduced spastizin and AP5Z1 mRNA expression in SPG15 and SPG48 forebrain neurons, respectively. **(A)** qRT-PCR analysis of spastizin expression in week 15 telencephalic, glutamatergic iSPG15 neuron cultures. **(B)** AP5Z1 expression in control and iSPG48 week 15 telencephalic, glutamatergic neuron cultures. Data are presented as means  $\pm$  SD. \* $P < 0.05$  versus iWT-1.

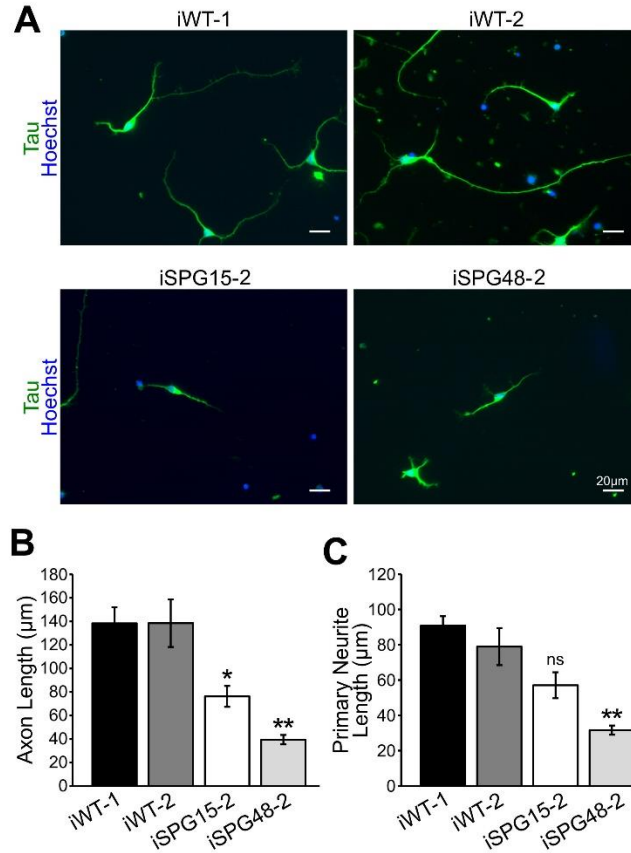

**Supplementary Figure 3.** Reduced neurite outgrowth from additional telencephalic, glutamatergic neuron clones. **(A)** Immunofluorescence images of day 33 forebrain neurons taken 72 h after plating. **(B)** Quantification of the longest neurite. **(C)** Mean length of primary neurites per cell. Data presented as mean  $\pm$  SEM. \* $P < 0.05$ ; \*\* $P < 0.01$  versus iWT; ns, not significant.
