# Supplementary material
Source: PubMed Central journal article supplement (PMC6031053)
Supplement: ddy156_supplementary_table_1.pdf [file ddy156_supplementary_table_1.pdf]

**Supplementary Table 1. Summary of iPSC lines used in the study**

| <b>Name</b> | <b>Pluripotency proteins</b> | <b>Genotype test</b>                             | <b>Teratoma test</b> | <b>Mycoplasma contamination</b> |
|-------------|------------------------------|--------------------------------------------------|----------------------|---------------------------------|
| iWT-1       | Positive                     | Normal                                           | Positive             | Negative                        |
| iWT-2       | Positive                     | Normal                                           | Positive             | Negative                        |
| iWT-Sib     | Positive                     | Normal                                           | Positive             | Negative                        |
| iSPG15-1    | Positive                     | <i>ZFYVE26</i> c.2554-1 G>A;<br>c.3417_3418insTA | Positive             | Negative                        |
| iSPG15-2    | Positive                     | <i>ZFYVE26</i> c.2554-1 G>A;<br>c.3417_3418insTA | Positive             | Negative                        |
| iSPG48-1    | Positive                     | <i>AP5Z1</i> , c.1732 C>T                        | Positive             | Negative                        |
| iSPG48-2    | Positive                     | <i>AP5Z1</i> ,c.1732 C>T                         | Positive             | Negative                        |
